# Supplementary material for: Integrated bioinformatics analysis of aberrantly-methylated differentially-expressed genes and pathways in age-related macular degeneration
Source: Springer Nature journal article supplement (doi:10.1186/s12886-020-01392-2), 2020-03-24
Supplement: MOESM4 [file 17827554]

**The statement provided by the ethics committee of Shanghai General  
Hospital, Shanghai Jiao Tong University School of Medicine,  
Shanghai, China.**

说明

因《表达谱芯片与 DNA 甲基化芯片综合分析发现年龄相关性黄斑变性患者发生、发展的分子靶标》不涉及人体试验伦理审查，故不出具伦理批件，特此说明。

上海市第一人民医院  
人体试验伦理委员会

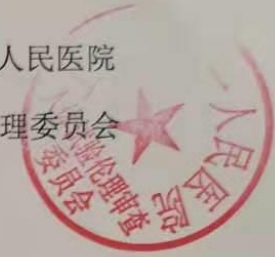

## **Translation**

### **Statement**

**There is no need to issue an ethical approval document for the study named “Integrated bioinformatics analysis of aberrantly methylated-differentially expressed genes and pathways in age-related macular degeneration” since it does not involve the ethical review of human experiments.**

**The ethics committee of Shanghai General Hospital,  
Shanghai Jiao Tong University School of Medicine, Shanghai, China**
